# Supplementary material for: Earth-abundant and environment friendly organic–inorganic hybrid tetrachloroferrate salt CH3NH3FeCl4: structure, adsorption properties and photoelectric behavior
Source: Royal Society of Chemistry journal article supplement (doi:10.1039/c8ra03498b), 2018-01-01
Supplement: c8ra03498b1.pdf [file c8ra03498b1.pdf]

## Supporting information

### Earth-abundant and Environment Friendly Organic-inorganic Hybrid Tetrachloroferrate Salt $\text{CH}_3\text{NH}_3\text{FeCl}_4$ : Structure, Adsorption Properties and Photoelectric Behavior

Jie Yin,<sup>a,\*</sup> Shaozhen Shi,<sup>a</sup> Jiazhen Wei,<sup>a</sup> Guohang He,<sup>a</sup> Lin Fan,<sup>a</sup> Junxue Guo,<sup>a</sup> Kaixuan Zhang,<sup>a</sup> Wenli Xu,<sup>a</sup> Cang Yuan,<sup>a</sup> Yunying Wang,<sup>a</sup> Liwen Wang,<sup>a</sup> Xipeng Pu,<sup>a</sup> Wenzhi Li,<sup>a</sup> Dafeng Zhang,<sup>a</sup> Jie Wang,<sup>a</sup> Xiaozhen Ren,<sup>a</sup> Huiyan Ma,<sup>a</sup> Xin Shao,<sup>a</sup> Huawei Zhou<sup>a,\*</sup>

<sup>a</sup>College of Materials Science and Engineering, Liaocheng University; School of Chemistry and Chemical Engineering, Liaocheng University; Shandong Provincial Key Laboratory of Chemical Energy Storage and Novel Cell Technology, Liaocheng 252059, China.

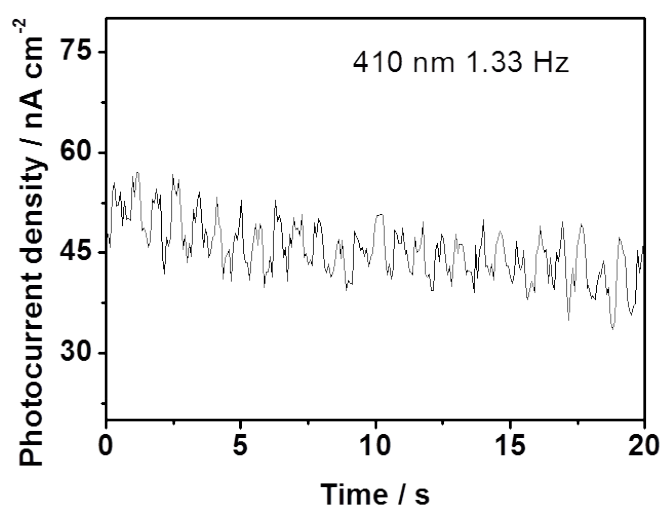

**Figure S1** photocurrent density-time characteristics of the FTO/TiO<sub>2</sub>/MAFeCl<sub>4</sub>/carbon electrode device under 410 nm with flashlight frequency 1.33 Hz.

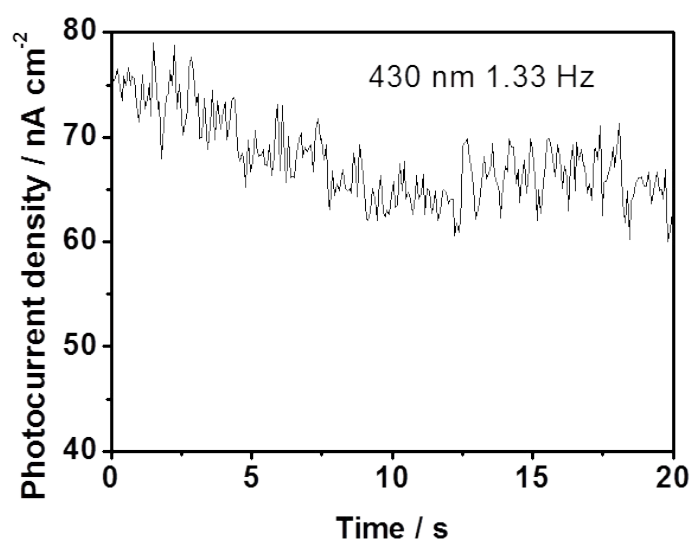

**Figure S2** photocurrent density-time characteristics of the FTO/TiO<sub>2</sub>/MAFeCl<sub>4</sub>/carbon electrode device under 430 nm with flashlight frequency 1.33 Hz.

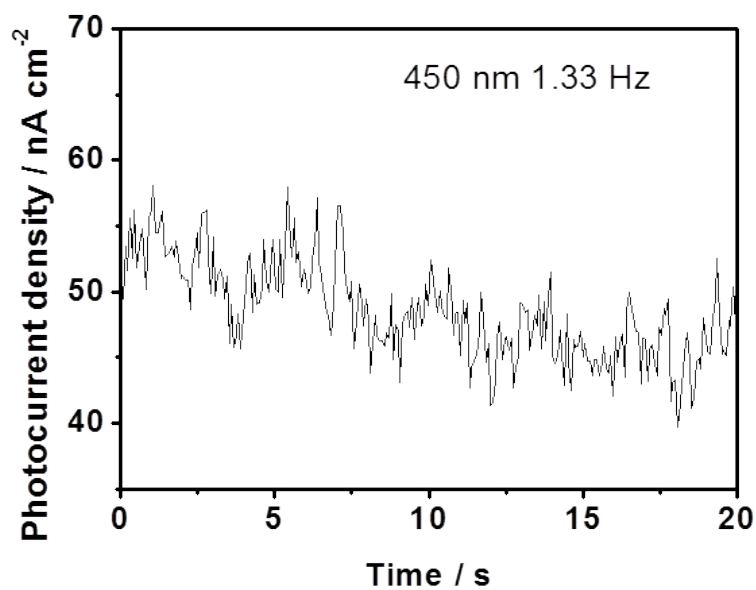

**Figure S3** photocurrent density-time characteristics of the FTO/TiO<sub>2</sub>/MAFeCl<sub>4</sub>/carbon electrode device under 450 nm with flashlight frequency 1.33 Hz.

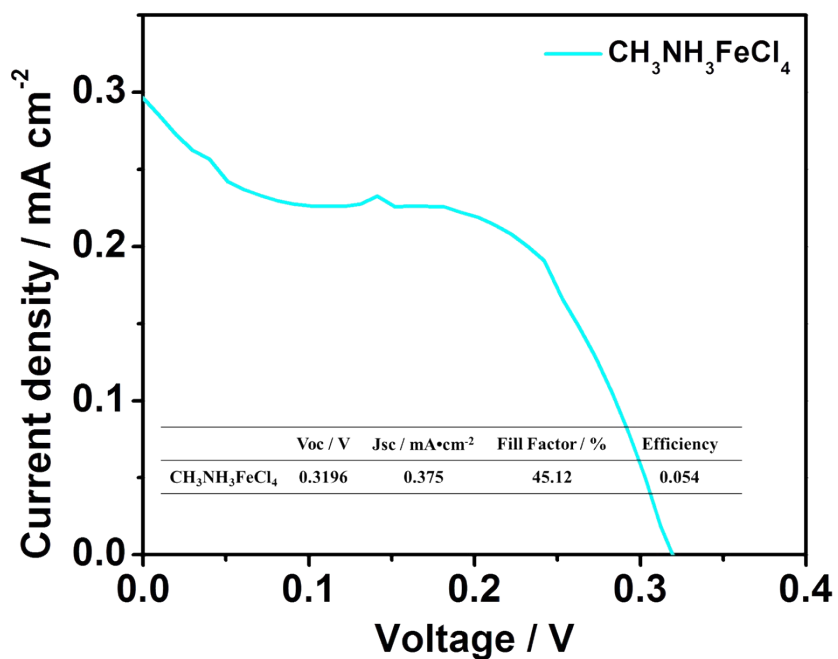

**Figure S4** The best photocurrent density-voltage curve of the FTO/TiO<sub>2</sub>/MAFeCl<sub>4</sub>/carbon electrode device under AM 1.5 (100 mW / cm<sup>2</sup>)

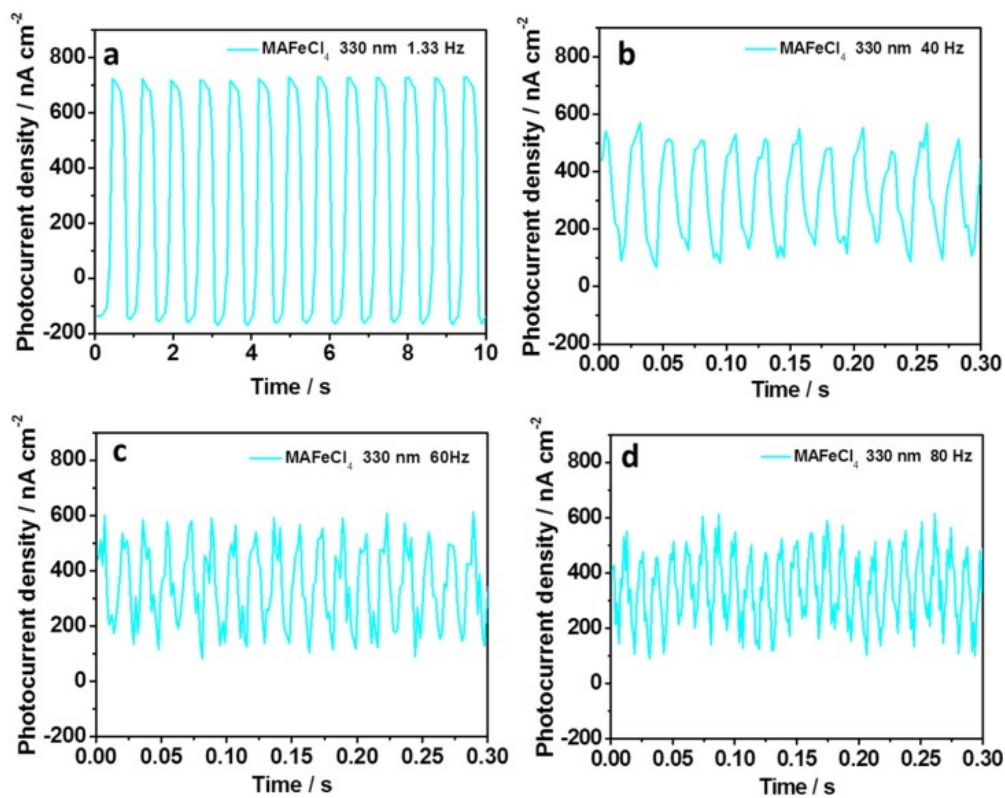

**Figure S5** Photocurrent density-time characteristics of the FTO/TiO<sub>2</sub>/MAFeCl<sub>4</sub>/carbon electrode device under different flashlight frequencies (1.33, 40, 60 and 80 Hz) with 330 nm light-beam.

Table S1. Atomic coordinates (  $\times 10^4$ ) and equivalent isotropic displacement parameters ( $\text{Å}^2 \times 10^3$ ) for CH<sub>3</sub>NH<sub>3</sub>FeCl<sub>4</sub>. U(eq) is defined as one third of the trace of the orthogonalized U<sub>ij</sub> tensor.

|       | x       | y       | z       | U(eq)  |
|-------|---------|---------|---------|--------|
| Fe(1) | 895(1)  | 7500    | 8027(1) | 58(1)  |
| Cl(1) | 882(1)  | 5072(2) | 6772(1) | 87(1)  |
| Cl(2) | 2512(2) | 7500    | 9166(2) | 96(1)  |
| Cl(3) | -606(2) | 7500    | 9324(2) | 131(1) |
| N(1)  | 1509(6) | 7500    | 2299(6) | 129(3) |
| C(1)  | 1757(7) | 7500    | 3653(8) | 93(2)  |

Table S2. Anisotropic displacement parameters ( $\text{Å}^2 \times 10^3$ ) for CH<sub>3</sub>NH<sub>3</sub>FeCl<sub>4</sub>. The anisotropic displacement factor exponent takes the form:  $-2 \pi^2 [ h^2 a^{*2} U_{11} + \dots + 2 h k a^* b^* U_{12} ]$

|       | U11    | U22     | U33    | U12    | U13    | U23   |
|-------|--------|---------|--------|--------|--------|-------|
| Fe(1) | 66(1)  | 52(1)   | 56(1)  | 0      | -1(1)  | 0     |
| Cl(1) | 105(1) | 64(1)   | 91(1)  | -21(1) | -7(1)  | -6(1) |
| Cl(2) | 97(1)  | 105(2)  | 85(1)  | 0      | -33(1) | 0     |
| Cl(3) | 110(2) | 165(2)  | 119(2) | 0      | 54(1)  | 0     |
| N(1)  | 87(5)  | 210(10) | 90(5)  | 0      | 21(4)  | 0     |
| C(1)  | 94(6)  | 101(6)  | 84(5)  | 0      | -15(4) | 0     |

Table S3 photocurrent density-voltage parameter of the FTO/TiO<sub>2</sub>/MAFeCl<sub>4</sub>/carbon electrode device under AM 1.5 (100 mW / cm<sup>2</sup>)

| V <sub>oc</sub> / V | J <sub>sc</sub> / mA·cm <sup>-2</sup> | Fill Factor / % | Efficiency |
|---------------------|---------------------------------------|-----------------|------------|
|---------------------|---------------------------------------|-----------------|------------|

---

|                    |         |         |          |         |
|--------------------|---------|---------|----------|---------|
| Mean               | 0.30949 | 0.30267 | 36.45619 | 0.03286 |
| Standard Deviation | 0.02072 | 0.06708 | 9.41458  | 0.00784 |

---
